# Supplementary material for: Carbon nanotube/chitosan nanocomposite as a biocompatible biocathode material to enhance the electricity generation of a microbial fuel cell
Source: Royal Society of Chemistry journal article supplement (doi:10.1039/c0ee00447b), 2011-01-01
Supplement: c0ee00447b.pdf [file c0ee00447b.pdf]

## Supporting information for

### **Carbon nanotube/chitosan nanocomposite as a biocompatible biocathode material to enhance the electricity generation of a microbial fuel cell**

Xian-Wei Liu<sup>1</sup>, Xue-Fei Sun<sup>2</sup>, Yu-Xi Huang<sup>1</sup>, Guo-Ping Sheng<sup>1</sup>, Shu-Guang Wang<sup>2</sup>,

Han-Qing Yu<sup>1,\*</sup>

<sup>1</sup>Department of Chemistry, University of Science & Technology of China, Hefei,  
230026, China

<sup>2</sup>School of Environmental Science and Engineering, Shandong University, Jinan,  
250100, China

#### **\*Corresponding author:**

Han-Qing Yu,

Fax: +86 551 3601592

E-mail: [hqyu@ustc.edu.cn](mailto:hqyu@ustc.edu.cn)

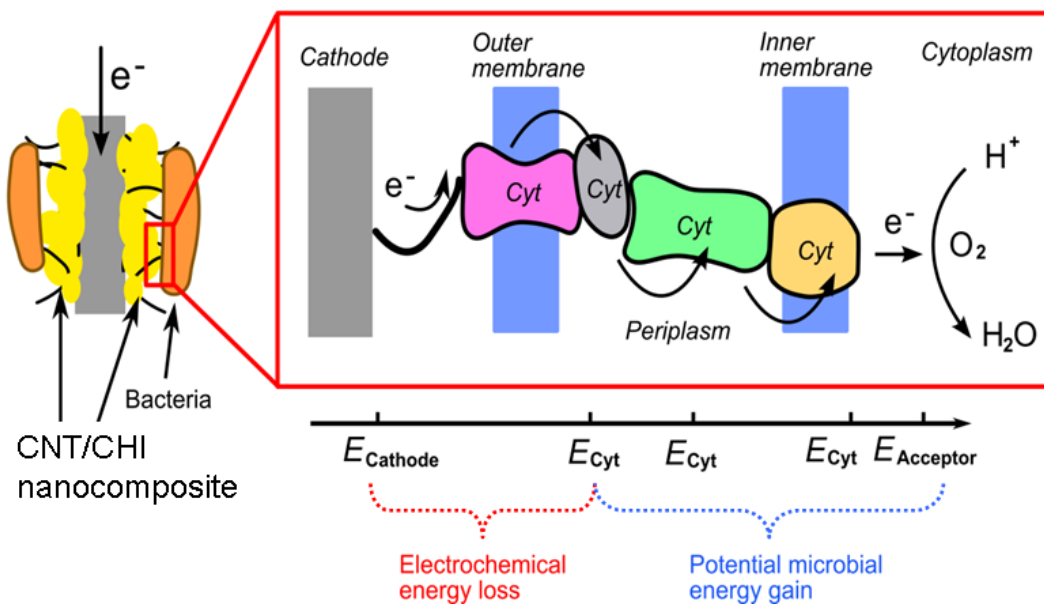

**Figure S1.** Proposed electron transfer process at the CNT/CHI nanocomposite/bacteria interface
